# Supplementary material
Source: Springer Nature journal article supplement (https://www.springermedizin.de/resource/supplementary/12985_2008_509_MOESM8_ESM.pdf/9607908)

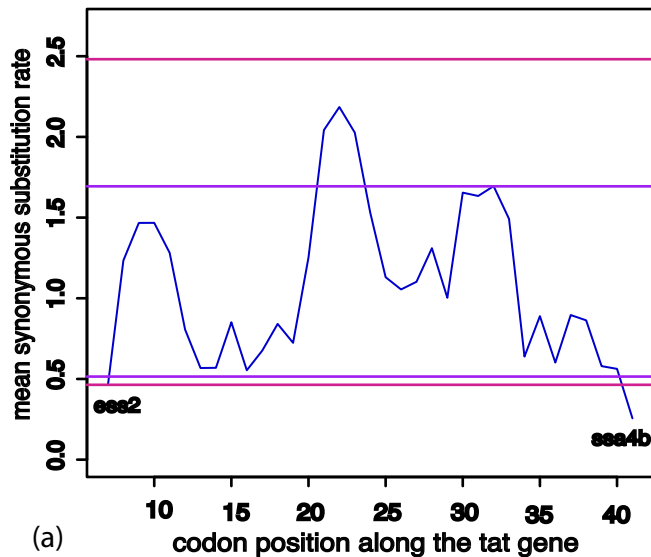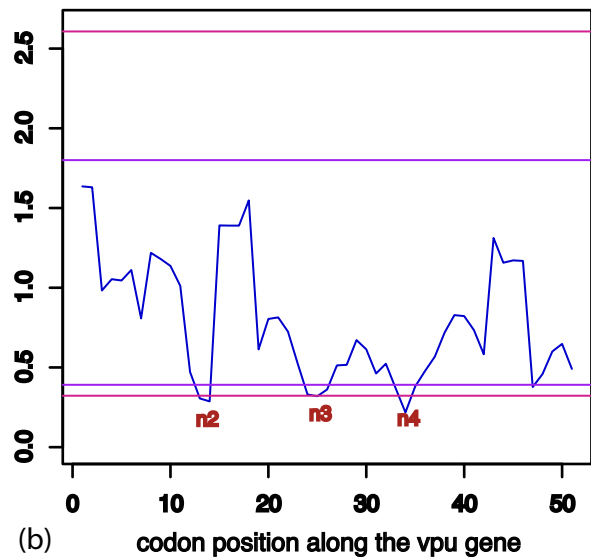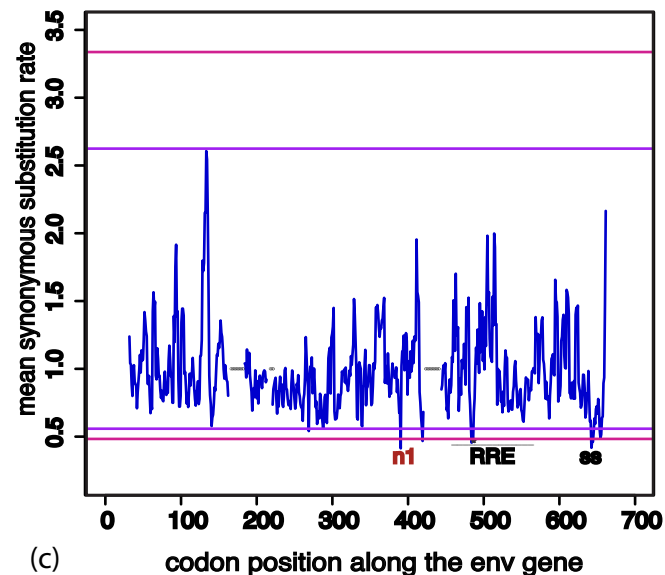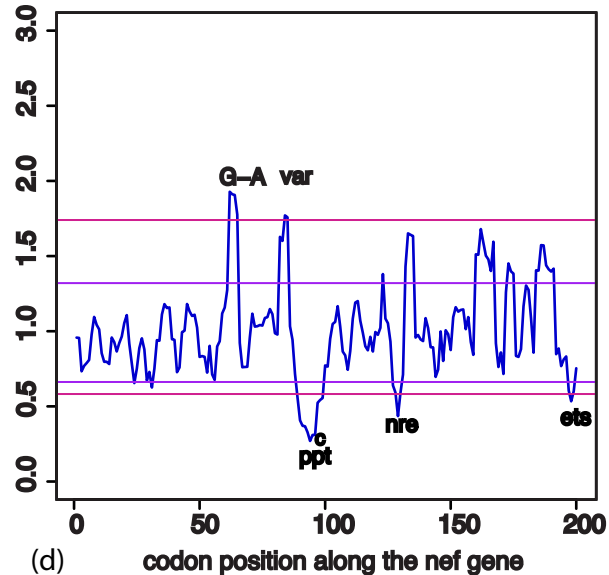

Supplement: MOESM8 [file 9607908]
